# Supplementary material for: Risk factors and prognostic role of renal adverse event in patients receiving immune checkpoint inhibitor therapy: analysis of data from a retrospective cohort study
Source: PubMed Central journal article supplement — Ann Transl Med. 2022 Sep;10(18):967. doi: 10.21037/atm-22-3684 (PMC9577783; doi:10.21037/atm-22-3684), 2022-09
Supplement: atm-10-18-967-dss.pdf [file atm-10-18-967-dss.pdf]

## Data Sharing Statement

|                     |                                                                                                                                                     |                                                            |
|---------------------|-----------------------------------------------------------------------------------------------------------------------------------------------------|------------------------------------------------------------|
| <b>Article Info</b> | <a href="https://dx.doi.org/10.21037/atm-22-3684">https://dx.doi.org/10.21037/atm-22-3684</a>                                                       |                                                            |
| <b>Item</b>         | <b>Question</b>                                                                                                                                     | <b>Authors' Response<br/>(place "-" if not applicable)</b> |
| 1                   | Would you like to share data collected for your study to others?                                                                                    | Yes.                                                       |
| 2                   | If not, would you like to share the reason for your decision?                                                                                       | -                                                          |
| 3                   | What data in particular will be shared?                                                                                                             | Patients' information.                                     |
| 4                   | Any other documents will be shared? Such as study protocol, statistical analysis plan, informed consent form, clinical study report, analytic code. | No.                                                        |
| 5                   | When will data availability begin?                                                                                                                  | When the manuscript is published.                          |
| 6                   | When will data availability end?                                                                                                                    | For 1year.                                                 |
| 7                   | To whom will you share the data?                                                                                                                    | Those who do the familiar research.                        |
| 8                   | For what type of analysis or purpose?                                                                                                               | Add theses data into his research.                         |
| 9                   | How or where can the data/documents be obtained?                                                                                                    | Contact with me by e-mail:<br>baojiangu0514@126.com.       |
| 10                  | Any other restrictions?                                                                                                                             | No.                                                        |
